# Supplementary material for: Association of serum uric acid with visceral, subcutaneous and hepatic fat quantified by magnetic resonance imaging
Source: PubMed Central journal article supplement (PMC6965096; doi:10.1038/s41598-020-57459-z), 2020-01-16
Supplement: 41598_2020_57459_MOESM1_ESM.pdf [file 41598_2020_57459_MOESM1_ESM.pdf]

Supplementary material to

## **Association of serum uric acid with visceral, subcutaneous and hepatic fat quantified by magnetic resonance imaging**

Susanne Rospleszcz<sup>1</sup>, Ditjon Dermyshe<sup>1,2,3</sup>, Katharina Müller-Peltzer<sup>4</sup>, Konstantin Strauch<sup>5,6</sup>, Fabian Bamberg<sup>4</sup>, Annette Peters<sup>1,7</sup>

<sup>1</sup> Institute of Epidemiology, Helmholtz Zentrum München - German Research Center for Environmental Health, Neuherberg, Germany

<sup>2</sup> Department of Medical Information Processing, Biometry, and Epidemiology, Faculty of Medicine, Ludwig-Maximilians-Universität München, Munich, Germany

<sup>3</sup> Regional Hospital of Mindelheim, Department of Internal Medicine, Mindelheim, Germany

<sup>4</sup> Department of Diagnostic and Interventional Radiology, Medical Center-University of Freiburg, Faculty of Medicine, University of Freiburg, Freiburg, Germany

<sup>5</sup> Institute of Genetic Epidemiology, Helmholtz Zentrum München - German Research Center for Environmental Health, Neuherberg, Germany

<sup>6</sup> Chair of Genetic Epidemiology, Institute for Medical Information Processing, Biometry, and Epidemiology, Faculty of Medicine, Ludwig-Maximilians-Universität München, Munich, Germany

<sup>7</sup> Chair of Epidemiology, Faculty of Medicine, Ludwig-Maximilians-Universität München, Munich, Germany

**Supplementary Table S1: Characteristics of the study population, sex-stratified**

**Supplementary Table S1A: Characteristics of the male study sample**

|                               | All male individuals<br>N = 217 | no Hyperuricemia<br>N = 160 (73.7%) | Hyperuricemia<br>N = 57 (26.3%) | pvalue   |
|-------------------------------|---------------------------------|-------------------------------------|---------------------------------|----------|
| Age, years                    | 56.0 ± 9.3                      | 55.7 ± 9.4                          | 56.9 ± 9.0                      | 0.407    |
| BMI, kg/m <sup>2</sup>        | 28.3 ± 4.1                      | 27.9 ± 4.2                          | 29.4 ± 3.7                      | 0.014    |
| Waist circumference, cm       | 102.9 ± 11.6                    | 101.4 ± 11.8                        | 107.2 ± 9.9                     | 0.001    |
| Systolic Blood Pressure, mmHg | 126.1 ± 16.0                    | 124.8 ± 15.6                        | 129.7 ± 16.7                    | 0.050    |
| Distolic Blood Pressure, mmHg | 77.7 ± 10.2                     | 77.4 ± 10.0                         | 78.5 ± 10.8                     | 0.492    |
| Albumin, mg/dL                | 4.4 ± 0.3                       | 4.4 ± 0.3                           | 4.4 ± 0.3                       | 0.186    |
| Total cholesterol, mg/dL      | 216.7 ± 37.8                    | 215.0 ± 35.6                        | 221.5 ± 43.6                    | 0.267    |
| HDL cholesterol, mg/dL        | 55.7 ± 15.0                     | 56.7 ± 13.9                         | 53.0 ± 17.6                     | 0.110    |
| LDL cholesterol, mg/dL        | 141.4 ± 33.6                    | 141.1 ± 32.5                        | 142.3 ± 36.6                    | 0.814    |
| Triglycerides, mg/dL          | 153.6 ± 101.2                   | 138.6 ± 82.0                        | 195.6 ± 134.0                   | 2.22E-04 |
| Creatinine, mg/dL             | 1.0 ± 0.1                       | 1.0 ± 0.1                           | 1.0 ± 0.1                       | 0.086    |
| Uric Acid, mg/dL              | 6.3 ± 1.3                       | 5.7 ± 0.8                           | 8.0 ± 0.9                       | 5.13E-43 |
| Antihypertensive medication   | 50 (23.0%)                      | 34 (21.2%)                          | 16 (28.1%)                      | 0.386    |
| Lipid-lowering medication     | 23 (10.6%)                      | 19 (11.9%)                          | 4 (7.0%)                        | 0.452    |
| Gout medication               | 9 (4.1%)                        | 8 (5.0%)                            | 1 (1.8%)                        | 0.451    |
| Diuretic medication           | 24 (11.1%)                      | 15 (9.4%)                           | 9 (15.8%)                       | 0.280    |
| Antidiabetic medication       | 19 (8.8%)                       | 14 (8.8%)                           | 5 (8.8%)                        | 1        |
| Smoking                       |                                 |                                     |                                 |          |
| never-smoker                  | 72 (33.2%)                      | 52 (32.5%)                          | 20 (35.1%)                      | 0.056    |
| ex-smoker                     | 103 (47.5%)                     | 71 (44.4%)                          | 32 (56.1%)                      |          |
| smoker                        | 42 (19.4%)                      | 37 (23.1%)                          | 5 (8.8%)                        |          |
| Alcohol consumption, g/d      | 26.1 ± 27.1                     | 25.0 ± 27.3                         | 29.4 ± 26.5                     | 0.292    |
| thereof beer                  | 18.0 ± 22.1                     | 15.5 ± 20.0                         | 25.1 ± 26.1                     | 0.004    |
| thereof wine                  | 7.5 ± 15.3                      | 8.8 ± 17.2                          | 3.6 ± 6.9                       | 0.028    |
| thereof spirits               | 0.6 ± 1.9                       | 0.6 ± 2.0                           | 0.6 ± 1.5                       | 0.873    |
| Fasting serum glucose, mg/dL  | 107.9 ± 25.5                    | 108.5 ± 28.4                        | 106.4 ± 14.5                    | 0.593    |
| Glycemic Status               |                                 |                                     |                                 |          |
| normoglycemic                 | 120 (55.3%)                     | 91 (56.9%)                          | 29 (50.9%)                      | 0.663    |

|                                   |            |            |             |          |
|-----------------------------------|------------|------------|-------------|----------|
| prediabetes                       | 59 (27.2%) | 41 (25.6%) | 18 (31.6%)  |          |
| diabetes                          | 38 (17.5%) | 28 (17.5%) | 10 (17.5%)  |          |
| Total abdominal adipose tissue, l | 13.0 ± 5.2 | 12.3 ± 5.2 | 15.2 ± 4.4  | 2.52E-04 |
| Visceral adipose tissue, l        | 5.6 ± 2.6  | 5.2 ± 2.5  | 6.8 ± 2.3   | 2.30E-05 |
| Subcutaneous adipose tissue, l    | 7.4 ± 3.2  | 7.1 ± 3.3  | 8.3 ± 2.7   | 0.010    |
| HFF_HISTO, %                      | 10.5 ± 8.5 | 9.4 ± 8.2  | 13.5 ± 8.5  | 0.002    |
| HFF_right lobe, %                 | 11.3 ± 9.1 | 10.0 ± 8.4 | 15.0 ± 10.0 | 3.64E-04 |
| HFF_left lobe, %                  | 9.6 ± 8.4  | 8.8 ± 8.4  | 11.9 ± 8.0  | 0.014    |
| log(HFF_HISTO, %)                 | 2.0 ± 0.9  | 1.9 ± 0.9  | 2.4 ± 0.8   | 3.84E-04 |
| HFF_dixon, %                      | 9.9 ± 8.4  | 8.7 ± 8.0  | 13.1 ± 8.9  | 0.001    |
| log(HFF_dixon, %)                 | 1.9 ± 0.9  | 1.8 ± 0.8  | 2.3 ± 0.8   | 2.21E-04 |

**Supplementary Table S1B: Characteristics of the female study sample**

|                               | All female individuals<br>N = 154 | no Hyperuricemia<br>N = 138 (89.6%) | Hyperuricemia<br>N = 16 (10.4%) | pvalue   |
|-------------------------------|-----------------------------------|-------------------------------------|---------------------------------|----------|
| Age, years                    | 56.1 ± 8.9                        | 55.5 ± 8.9                          | 61.5 ± 7.2                      | 0.010    |
| BMI, kg/m <sup>2</sup>        | 27.2 ± 5.3                        | 26.8 ± 5.0                          | 31.2 ± 6.1                      | 0.001    |
| Waist circumference, cm       | 90.8 ± 13.4                       | 89.5 ± 12.9                         | 102.2 ± 12.9                    | 2.61E-04 |
| Systolic Blood Pressure, mmHg | 113.0 ± 14.0                      | 111.9 ± 12.3                        | 122.7 ± 22.1                    | 0.003    |
| Distolic Blood Pressure, mmHg | 72.0 ± 8.3                        | 71.9 ± 8.1                          | 73.3 ± 9.8                      | 0.529    |
| Albumin, mg/dL                | 4.3 ± 0.3                         | 4.3 ± 0.3                           | 4.3 ± 0.3                       | 0.756    |
| Total cholesterol, mg/dL      | 218.8 ± 34.2                      | 219.2 ± 35.1                        | 215.9 ± 26.1                    | 0.717    |
| HDL cholesterol, mg/dL        | 70.6 ± 17.8                       | 71.2 ± 18.3                         | 65.7 ± 11.6                     | 0.249    |
| LDL cholesterol, mg/dL        | 136.4 ± 31.8                      | 136.8 ± 32.7                        | 133.0 ± 22.6                    | 0.651    |
| Triglycerides, mg/dL          | 100.9 ± 42.7                      | 98.1 ± 41.9                         | 124.8 ± 43.2                    | 0.018    |
| Creatinine, mg/dL             | 0.8 ± 0.1                         | 0.8 ± 0.1                           | 0.9 ± 0.1                       | 8.24E-05 |
| Uric Acid, mg/dL              | 4.6 ± 1.1                         | 4.3 ± 0.8                           | 6.8 ± 0.8                       | 8.54E-23 |
| Antihypertensive medication   | 40 (26.0%)                        | 32 (23.2%)                          | 8 (50.0%)                       | 0.044    |
| Lipid-lowering medication     | 16 (10.4%)                        | 13 (9.4%)                           | 3 (18.8%)                       | 0.221    |
| Gout medication               | 0 (0.0%)                          | NA                                  | NA                              |          |
| Diuretic medication           | 21 (13.6%)                        | 13 (9.4%)                           | 8 (50.0%)                       | 4.26E-05 |

|                                   |             |             |              |          |
|-----------------------------------|-------------|-------------|--------------|----------|
| Antidiabetic medication           | 10 (6.5%)   | 8 (5.8%)    | 2 (12.5%)    | 0.278    |
| Smoking                           |             |             |              |          |
| never-smoker                      | 62 (40.3%)  | 55 (39.9%)  | 7 (43.8%)    | 1        |
| ex-smoker                         | 58 (37.7%)  | 52 (37.7%)  | 6 (37.5%)    |          |
| smoker                            | 34 (22.1%)  | 31 (22.5%)  | 3 (18.8%)    |          |
| Alcohol consumption, g/d          | 8.7 ± 14.0  | 7.8 ± 11.2  | 15.9 ± 28.2  | 0.029    |
| thereof beer                      | 2.5 ± 5.4   | 2.2 ± 4.7   | 5.1 ± 9.5    | 0.041    |
| thereof wine                      | 5.9 ± 12.0  | 5.4 ± 9.7   | 10.4 ± 24.2  | 0.117    |
| thereof spirits                   | 0.3 ± 0.9   | 0.3 ± 0.9   | 0.4 ± 1.2    | 0.444    |
| Fasting serum glucose, mg/dL      | 98.5 ± 16.8 | 97.4 ± 16.4 | 107.6 ± 17.7 | 0.021    |
| Glycemic Status                   |             |             |              |          |
| normoglycemic                     | 111 (72.1%) | 104 (75.4%) | 7 (43.8%)    | 0.014    |
| prediabetes                       | 31 (20.1%)  | 25 (18.1%)  | 6 (37.5%)    |          |
| diabetes                          | 12 (7.8%)   | 9 (6.5%)    | 3 (18.8%)    |          |
| Total abdominal adipose tissue, l | 11.7 ± 5.4  | 11.1 ± 5.1  | 16.7 ± 5.5   | 7.45E-05 |
| Visceral adipose tissue, l        | 2.8 ± 2.0   | 2.5 ± 1.6   | 5.4 ± 2.8    | 5.4E-09  |
| Subcutaneous adipose tissue, l    | 8.8 ± 3.9   | 8.6 ± 3.8   | 11.2 ± 4.0   | 0.009    |
| HFF_HISTO, %                      | 6.0 ± 6.0   | 5.2 ± 5.0   | 12.7 ± 8.9   | 7.51E-07 |
| HFF_right lobe, %                 | 6.7 ± 6.7   | 5.8 ± 5.7   | 14.0 ± 9.6   | 1.52E-06 |
| HFF_left lobe, %                  | 5.3 ± 5.4   | 4.6 ± 4.5   | 11.4 ± 8.4   | 8.41E-07 |
| log(HFF_HISTO, %)                 | 1.4 ± 0.9   | 1.3 ± 0.8   | 2.3 ± 0.8    | 8.73E-06 |
| HFF_dixon, %                      | 6.0 ± 7.5   | 5.2 ± 6.9   | 12.8 ± 9.7   | 9.38E-05 |
| log(HFF_dixon, %)                 | 1.3 ± 0.9   | 1.2 ± 0.9   | 2.2 ± 0.9    | 1.46E-05 |

Continuous variables are presented as mean ± standard deviation with p-values from t-test. Categorical variables are presented as counts and percentage with p-values from Wilcoxon rank-sum test. Hyperuricemia was defined as serum uric acid levels >6 mg/dL in women and >7 mg/dL in men. P-values are exploratory and not corrected for multiple testing.

**Supplementary Table S2:** Sensitivity analysis: Association of SUA and Hyperuricemia with MRI-derived adipose tissue content after exclusion of n = 9 individuals taking anti-gout medication

|                        | VAT     |              |          |                | SAT     |               |          |                | HFF_HISTO |              |          |                | HFF_dixon |              |          |                |
|------------------------|---------|--------------|----------|----------------|---------|---------------|----------|----------------|-----------|--------------|----------|----------------|-----------|--------------|----------|----------------|
|                        | $\beta$ | 95%-CI       | p-value  | R <sup>2</sup> | $\beta$ | 95%-CI        | p-value  | R <sup>2</sup> | Est.      | 95%-CI       | p-value  | R <sup>2</sup> | Est.      | 95%-CI       | p-value  | R <sup>2</sup> |
| Exposure SUA           |         |              |          |                |         |               |          |                |           |              |          |                |           |              |          |                |
| Age+sex adjusted       | 1.13    | [0.88, 1.38] | 4.71E-17 | 0.45           | 1.30    | [0.87, 1.73]  | 6.54E-09 | 0.12           | 1.52      | [1.38, 1.67] | 5.98E-16 | 0.30           | 1.52      | [1.38, 1.68] | 5.66E-15 | 0.28           |
| fully adjusted         | 0.86    | [0.62, 1.11] | 2.04E-11 | 0.55           | 0.90    | [0.48, 1.32]  | 2.86E-05 | 0.29           | 1.35      | [1.23, 1.48] | 1.00E-09 | 0.43           | 1.34      | [1.22, 1.48] | 7.05E-09 | 0.44           |
| fully adjusted + WC    | 0.42    | [0.23, 0.62] | 2.52E-05 | 0.74           | -0.09   | [-0.32, 0.14] | 0.447    | 0.81           | 1.21      | [1.11, 1.32] | 3.49E-05 | 0.54           | 1.20      | [1.09, 1.31] | 1.64E-04 | 0.54           |
| fully adjusted + BMI   | 0.55    | [0.34, 0.76] | 4.19E-07 | 0.69           | 0.07    | [-0.15, 0.29] | 0.523    | 0.82           | 1.26      | [1.14, 1.38] | 1.61E-06 | 0.50           | 1.23      | [1.13, 1.36] | 8.97E-06 | 0.51           |
| Exposure Hyperuricemia |         |              |          |                |         |               |          |                |           |              |          |                |           |              |          |                |
| Age+sex adjusted       | 1.89    | [1.35, 2.42] | 1.97E-11 | 0.41           | 1.77    | [0.86, 2.68]  | 1.46E-04 | 0.08           | 1.79      | [1.45, 2.20] | 9.19E-08 | 0.22           | 1.84      | [1.48, 2.29] | 9.85E-08 | 0.21           |
| fully adjusted         | 1.51    | [1.02, 2.00] | 3.44E-09 | 0.54           | 1.18    | [0.34, 2.02]  | 0.006    | 0.27           | 1.49      | [1.23, 1.82] | 3.89E-05 | 0.40           | 1.51      | [1.25, 1.84] | 4.33E-05 | 0.41           |
| fully adjusted + WC    | 0.89    | [0.52, 1.26] | 3.44E-06 | 0.74           | -0.17   | [-0.61, 0.26] | 0.433    | 0.81           | 1.27      | [1.07, 1.51] | 0.007    | 0.52           | 1.27      | [1.07, 1.52] | 0.007    | 0.53           |
| fully adjusted + BMI   | 1.09    | [0.69, 1.50] | 1.92E-07 | 0.69           | 0.11    | [-0.31, 0.53] | 0.601    | 0.82           | 1.35      | [1.13, 1.62] | 0.001    | 0.48           | 1.35      | [1.13, 1.63] | 0.001    | 0.50           |

Results from a linear regression model with outcome adipose tissue. Exposure was either the continuous variable SUA or the dichotomous variable Hyperuricemia, defined as serum uric acid levels >6 mg/dL in women and >7 mg/dL in men. The fully adjusted model was adjusted for age, sex, systolic blood pressure, total serum cholesterol, serum albumin, alcohol consumption, diuretic medication and glycemic status. Continuous exposure and adjustment variables were standardized (mean = 0, standard deviation = 1) before analysis. Outcome hepatic fat fraction (HFF) was log-transformed and resulting estimates therefore denote the percent change in mean HFF. Continuous exposure and adjustment variables were standardized (mean = 0, standard deviation = 1) before analysis; therefore estimates for models with exposure SUA denote the change in adipose tissue per one standard deviation of SUA. R<sup>2</sup> denotes the percentage of variance in the outcome that is explained by the model. P-values are

exploratory and not corrected for multiple testing. VAT: visceral adipose tissue; SAT: subcutaneous adipose tissue; HFF\_HISTO: hepatic fat fraction as measured by high-speed T2-corrected multi-echo technique (HISTO); HFF\_dixon: hepatic fat fraction, as measured by multiecho Dixon-sequence. Est.: Estimate

**Supplementary Table S3:** Sensitivity analysis: Association of SUA and Hyperuricemia with MRI-derived adipose tissue content adjusting for fasting serum glucose instead of diabetes

|                        | VAT     |              |          |                | SAT     |               |          |                | HFF_HISTO |              |          |                | HFF_dixon |              |          |                |
|------------------------|---------|--------------|----------|----------------|---------|---------------|----------|----------------|-----------|--------------|----------|----------------|-----------|--------------|----------|----------------|
|                        | $\beta$ | 95%-CI       | p-value  | R <sup>2</sup> | $\beta$ | 95%-CI        | p-value  | R <sup>2</sup> | Estimate  | 95%-CI       | p-value  | R <sup>2</sup> | Estimate  | 95%-CI       | p-value  | R <sup>2</sup> |
| Exposure SUA           |         |              |          |                |         |               |          |                |           |              |          |                |           |              |          |                |
| fully adjusted         | 0.89    | [0.64, 1.15] | 2.73E-11 | 0.53           | 0.87    | [0.45, 1.30]  | 5.92E-05 | 0.26           | 1.36      | [1.25, 1.51] | 5.17E-10 | 0.39           | 1.36      | [1.23, 1.51] | 1.28E-09 | 0.40           |
| men                    | 0.69    | [0.38, 0.99] | 1.83E-05 | 0.30           | 0.67    | [0.27, 1.06]  | 0.001    | 0.25           | 1.21      | [1.09, 1.35] | 4.29E-04 | 0.26           | 1.20      | [1.07, 1.32] | 0.001    | 0.27           |
| women                  | 0.61    | [0.36, 0.87] | 5.15E-06 | 0.48           | 0.64    | [0.02, 1.27]  | 0.042    | 0.21           | 1.36      | [1.22, 1.54] | 2.61E-07 | 0.42           | 1.39      | [1.23, 1.57] | 1.70E-07 | 0.44           |
| fully adjusted + WC    | 0.41    | [0.22, 0.60] | 4.13E-05 | 0.75           | -0.14   | [-0.36, 0.09] | 0.230    | 0.81           | 1.21      | [1.11, 1.32] | 3.05E-05 | 0.52           | 1.21      | [1.11, 1.32] | 6.33E-05 | 0.53           |
| men                    | 0.24    | [0.02, 0.46] | 0.034    | 0.66           | -0.02   | [-0.23, 0.19] | 0.837    | 0.81           | 1.09      | [0.99, 1.20] | 0.074    | 0.44           | 1.08      | [0.98, 1.20] | 0.106    | 0.42           |
| women                  | 0.33    | [0.15, 0.51] | 5.29E-04 | 0.75           | -0.19   | [-0.50, 0.12] | 0.227    | 0.81           | 1.27      | [1.14, 1.42] | 1.94E-05 | 0.51           | 1.28      | [1.15, 1.42] | 1.68E-05 | 0.56           |
| fully adjusted + BMI   | 0.55    | [0.33, 0.76] | 6.25E-07 | 0.69           | 0.03    | [-0.18, 0.24] | 0.798    | 0.82           | 1.26      | [1.15, 1.38] | 1.30E-06 | 0.48           | 1.26      | [1.14, 1.38] | 2.90E-06 | 0.49           |
| men                    | 0.36    | [0.11, 0.60] | 0.005    | 0.57           | 0.09    | [-0.12, 0.30] | 0.405    | 0.80           | 1.12      | [1.02, 1.23] | 0.022    | 0.39           | 1.12      | [1.01, 1.23] | 0.035    | 0.37           |
| women                  | 0.39    | [0.20, 0.58] | 6.73E-05 | 0.73           | -0.05   | [-0.34, 0.24] | 0.742    | 0.84           | 1.31      | [1.17, 1.46] | 4.78E-06 | 0.48           | 1.31      | [1.17, 1.46] | 3.90E-06 | 0.53           |
| Exposure Hyperuricemia |         |              |          |                |         |               |          |                |           |              |          |                |           |              |          |                |

|                      |      |              |          |      |       |               |       |      |      |              |          |      |      |              |          |      |
|----------------------|------|--------------|----------|------|-------|---------------|-------|------|------|--------------|----------|------|------|--------------|----------|------|
| fully adjusted       | 1.58 | [1.06, 2.09] | 3.88E-09 | 0.52 | 1.2   | [0.35, 2.05]  | 0.006 | 0.24 | 1.55 | [1.27, 1.88] | 1.80E-05 | 0.36 | 1.58 | [1.30, 1.93] | 9.59E-06 | 0.37 |
| men                  | 1.38 | [0.71, 2.05] | 6.89E-05 | 0.29 | 1.10  | [0.23, 1.97]  | 0.014 | 0.24 | 1.43 | [1.14, 1.80] | 0.002    | 0.25 | 1.45 | [1.15, 1.82] | 0.002    | 0.27 |
| women                | 1.81 | [0.97, 2.65] | 3.60E-05 | 0.46 | 1.47  | [-0.56, 3.51] | 0.154 | 0.19 | 1.80 | [1.22, 2.69] | 0.004    | 0.35 | 1.80 | [1.20, 2.72] | 0.005    | 0.36 |
| fully adjusted + WC  | 0.89 | [0.52, 1.27] | 4.32E-06 | 0.75 | -0.21 | [-0.64, 0.23] | 0.348 | 0.81 | 1.30 | [1.08, 1.54] | 4.75E-03 | 0.50 | 1.31 | [1.09, 1.57] | 0.003    | 0.52 |
| men                  | 0.63 | [0.16, 1.10] | 0.009    | 0.67 | -0.06 | [-0.51, 0.38] | 0.776 | 0.81 | 1.20 | [0.98, 1.46] | 0.084    | 0.44 | 1.23 | [1.00, 1.52] | 0.049    | 0.42 |
| women                | 1.22 | [0.64, 1.80] | 4.88E-05 | 0.75 | -0.22 | [-1.22, 0.78] | 0.658 | 0.81 | 1.54 | [1.07, 2.20] | 0.020    | 0.46 | 1.48 | [1.03, 2.14] | 0.034    | 0.52 |
| fully adjusted + BMI | 1.12 | [0.71, 1.53] | 1.69E-07 | 0.70 | 0.11  | [-0.30, 0.52] | 0.602 | 0.82 | 1.38 | [1.15, 1.65] | 6.52E-04 | 0.46 | 1.40 | [1.16, 1.70] | 3.73E-04 | 0.47 |
| men                  | 0.92 | [0.40, 1.44] | 6.09E-04 | 0.58 | 0.3   | [-0.16, 0.75] | 0.202 | 0.80 | 1.28 | [1.04, 1.58] | 0.020    | 0.40 | 1.32 | [1.06, 1.63] | 0.012    | 0.38 |
| women                | 1.20 | [0.59, 1.80] | 1.61E-04 | 0.73 | -0.43 | [-1.36, 0.50] | 0.359 | 0.84 | 1.57 | [1.07, 2.29] | 0.020    | 0.42 | 1.51 | [1.03, 2.20] | 0.037    | 0.47 |

Results from a linear regression model with outcome adipose tissue. Exposure was either the continuous variable SUA or the dichotomous variable Hyperuricemia, defined as serum uric acid levels >6 mg/dL in women and >7 mg/dL in men. The fully adjusted model was adjusted for age, sex (if not sex-stratified), systolic blood pressure, total serum cholesterol, serum albumin, alcohol consumption, diuretic medication and fasting serum glucose. Continuous exposure and adjustment variables were standardized (mean = 0, standard deviation = 1) before analysis. Outcome hepatic fat fraction (HFF) was log-transformed and resulting estimates therefore denote the percent change in mean HFF. Continuous exposure and adjustment variables were standardized (mean = 0, standard deviation = 1) before analysis; therefore estimates for models with exposure SUA denote the change in adipose tissue per one standard deviation of SUA. R<sup>2</sup> denotes the percentage of variance in the outcome that is explained by the model. P-values are exploratory and not corrected for multiple testing. VAT: visceral adipose tissue; SAT: subcutaneous adipose tissue; HFF\_HISTO: hepatic fat fraction as measured by high-speed T2-corrected multi-echo technique (HISTO); HFF\_dixon: hepatic fat fraction, as measured by multiecho Dixon-sequence
